# Supplementary material for: Template-based fabrication of spatially organized 3D bioactive constructs using magnetic low-concentration gelation methacrylate (GelMA) microfibers
Source: Royal Society of Chemistry journal article supplement (doi:10.1039/c9sm01945f), 2020-01-01
Supplement: c9sm01945f1.pdf [file c9sm01945f1.pdf]

## Supporting Information

### Template-Based Fabrication of Spatially Organized 3D Bioactive Constructs Using Magnetic Low-Concentration Gelatin Methacrylate (GelMA) Microfibers

*Tao Sun, Yibing Yao, Qing Shi\*, Huaping Wang, Paolo Dario, Junzhong Sun, Qiang Huang, and Toshio Fukuda*

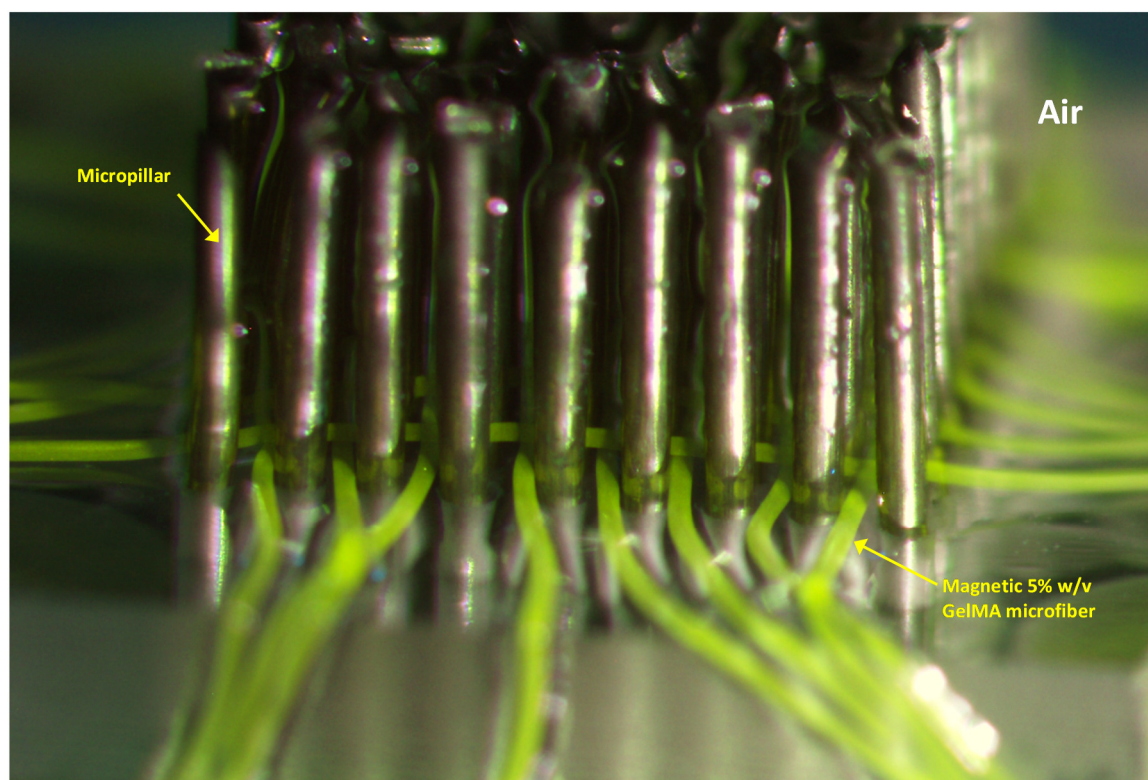

**Figure S1.** Surface tension enables the upper and lower microfibers to directly contact where they crossed.

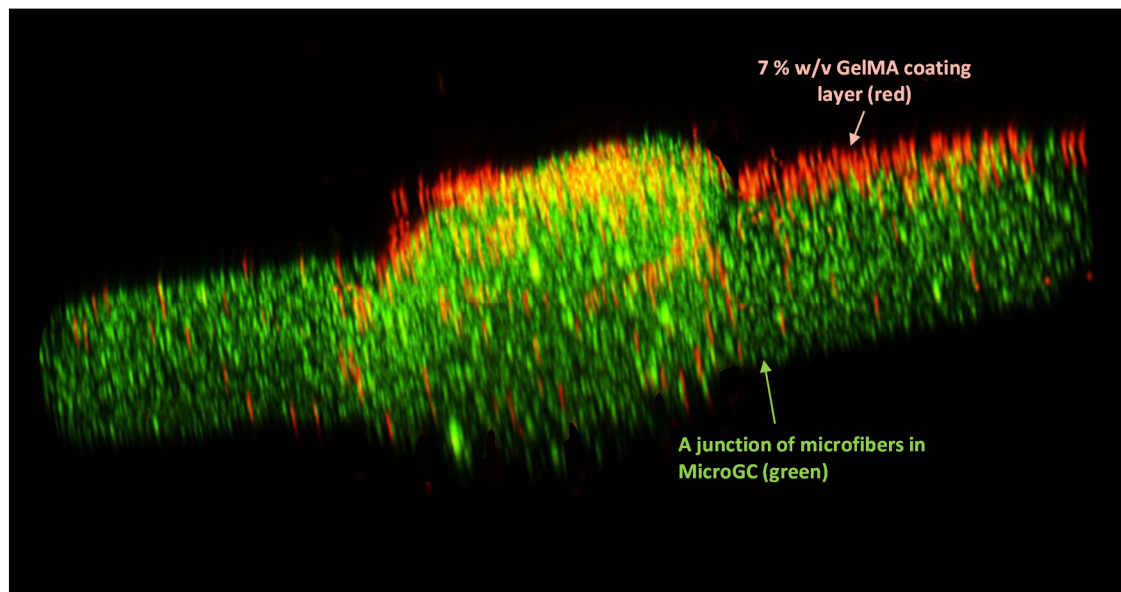

**Figure S2.** Side view shows that thin and sparse coating layer (containing red fluorescence beads) only existed on the upper surface of the assembled structure (containing green fluorescence beads).

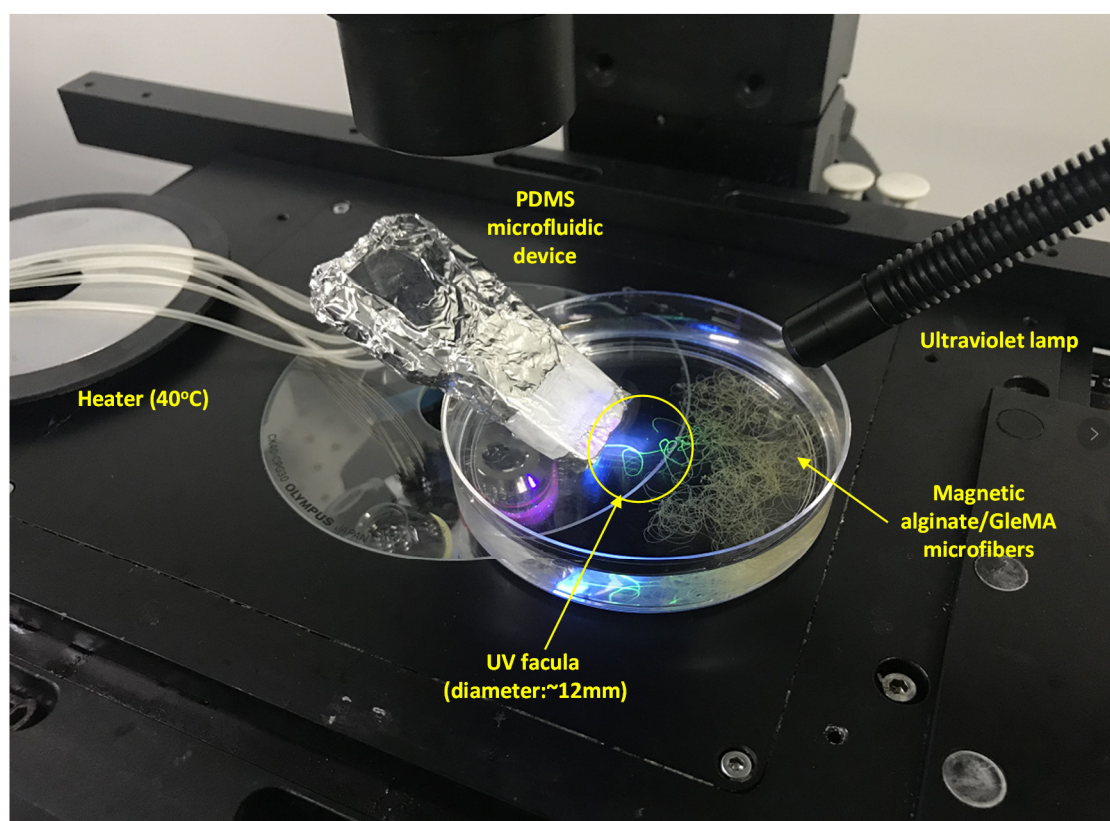

**Figure S3.** Microfluidic spinning system. Because of the encapsulation of green fluorescent quantum dots, the green microfibers was presented in the UV facula.

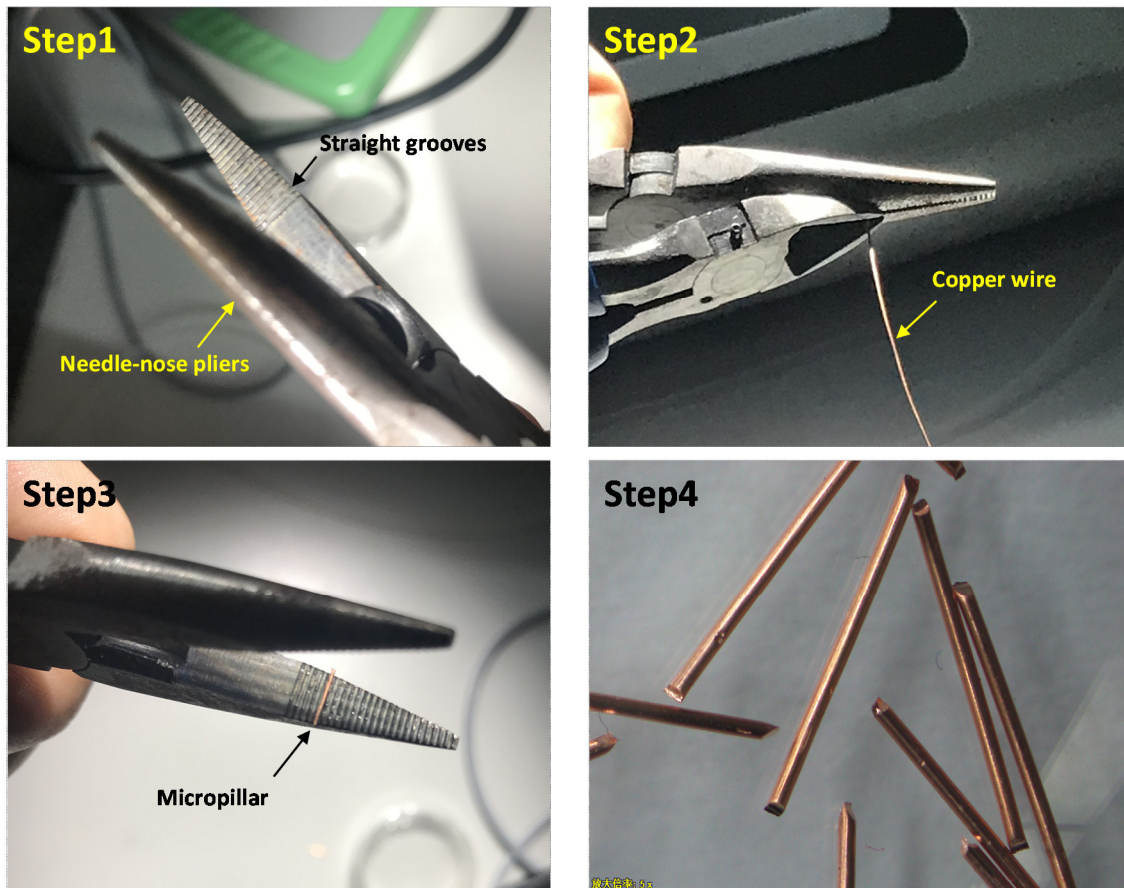

**Figure S4.** The fabrication process of micropillars



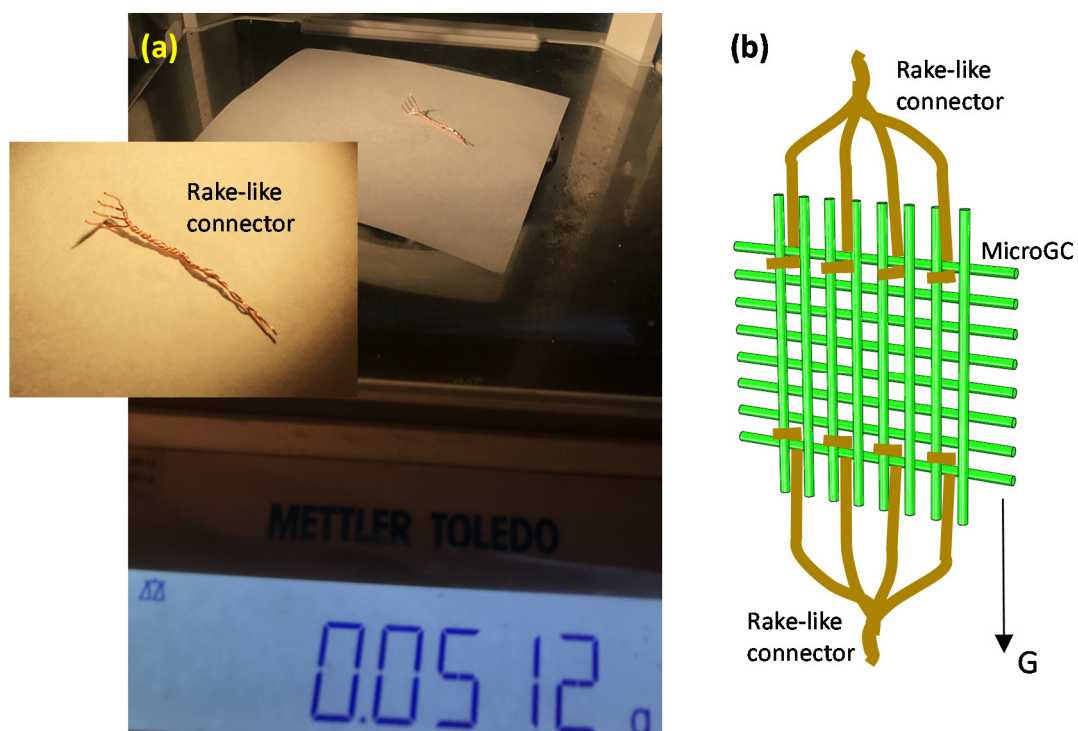

**Figure S5.** (a) Rake-like connector with weight of 0.05g. (b) Schematic of enabling a weight to be hung on the microGC by using two rake-like connectors.

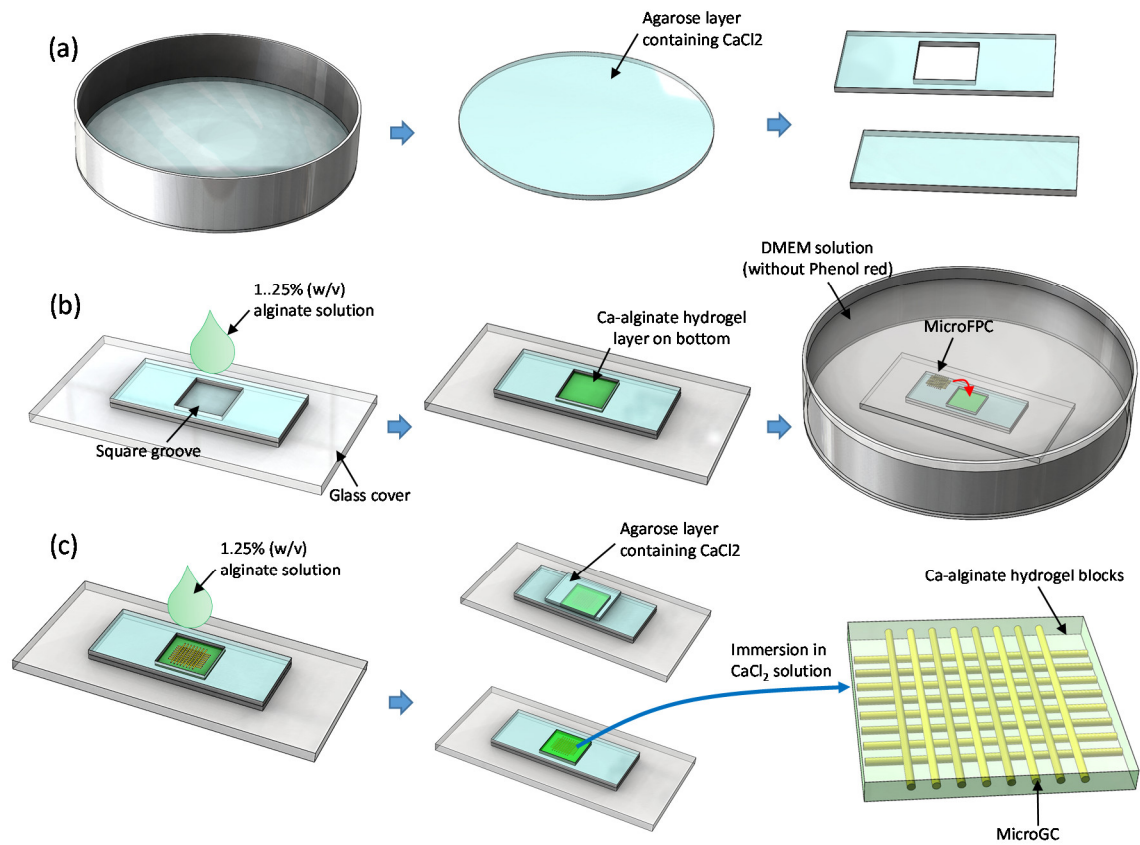

**Figure S6.** The fabrication process of sandwiched construct.
